# Supplementary material for: Keggin POM-based 3D framework tuned by silver polymeric motifs: structural influences of tetrazolate functional groups
Source: Royal Society of Chemistry journal article supplement (doi:10.1039/c2ce26193f), 2012-01-01
Supplement: c2ce26193f.pdf [file c2ce26193f.pdf]

## Keggin POM-based 3D Framework Tuned by Silver Polymeric Motifs: Structural Influences of Tetrazolate Functional Groups

Xiang Wang<sup>a, b</sup>, Jun Peng<sup>a\*</sup>, Kundawlet Alimaje<sup>a</sup>, Zhenyu Shi<sup>a</sup>

<sup>a</sup> Key Laboratory of Polyoxometalate Science of Ministry of Education, Faculty of Chemistry, Northeast Normal University, Changchun, Jilin, 130024, P. R. China

E-mail: jpeng@nenu.edu.cn

<sup>b</sup> Department of Chemistry, Bohai University, Jinzhou, Liaoning, 121000, P. R. China

**Table S1.** Selected bond lengths (Å) and angles (°) of compounds **1** and **2**.

| Compound 1                                                                                              |           |                     |           |
|---------------------------------------------------------------------------------------------------------|-----------|---------------------|-----------|
| Ag(1)-N(10)                                                                                             | 2.099(11) | Ag(3)#3-N(1)        | 2.264(10) |
| Ag(1)-N(11)                                                                                             | 2.101(15) | Ag(3)-N(2)          | 2.237(9)  |
| Ag(2)-N(12)                                                                                             | 2.215(11) | Ag(4)#2-N(9)        | 2.564(13) |
| Ag(2)-N(8)                                                                                              | 2.267(10) | Ag(4)-N(5)          | 2.580(13) |
| Ag(2)#2-N(6)                                                                                            | 2.203(10) | Ag(4)-O(1W)         | 2.07(5)   |
| Ag(3)#3-N(7)                                                                                            | 2.336(10) | Ag(4)-N(9)#2        | 2.564(13) |
| N(10)-Ag(1)-N(11)                                                                                       | 175.4(6)  | N(2)-Ag(3)-N(7)#3   | 112.4(3)  |
| N(6)#2-Ag(2)-N(12)                                                                                      | 131.1(4)  | N(1)#3-Ag(3)-N(7)#3 | 110.7(3)  |
| N(6)#2-Ag(2)-N(8)                                                                                       | 115.0(4)  | O(1W)-Ag(4)-N(9)#2  | 80.2(8)   |
| N(12)-Ag(2)-N(8)                                                                                        | 110.7(4)  | O(1W)-Ag(4)-N(5)    | 142.0(10) |
| N(2)-Ag(3)-N(1)#3                                                                                       | 134.3(3)  | N(9)#2-Ag(4)-N(5)   | 123.0(5)  |
| Symmetry transformations used to generate equivalent atoms for 1: #2 -x+2,-y-1,-z+1; #3 -x+1,-y-1,-z+1. |           |                     |           |
| Compound 2                                                                                              |           |                     |           |
| Ag(1)-N(2)                                                                                              | 2.102(10) | Ag(4)-N(7)          | 2.126(9)  |
| Ag(1)-N(10)                                                                                             | 2.148(8)  | Ag(4)-N(4)          | 2.172(9)  |
| Ag(2)-N(13)#1                                                                                           | 2.116(8)  | Ag(4)-O(21)         | 2.546(7)  |
| Ag(2)-N(14)                                                                                             | 2.135(9)  | Ag(5)-N(8)          | 2.222(9)  |
| Ag(3)-N(1)                                                                                              | 2.140(9)  | Ag(5)-O(20)         | 2.423(7)  |
| Ag(3)-N(9)                                                                                              | 2.147(8)  | N(2)-Ag(1)-N(10)    | 166.8(4)  |
| N(13)#1-Ag(2)-N(14)                                                                                     | 175.4(3)  | N(7)-Ag(4)-O(21)    | 98.2(3)   |
| N(1)-Ag(3)-N(9)                                                                                         | 163.3(4)  | N(4)-Ag(4)-O(21)    | 80.6(3)   |
| N(7)-Ag(4)-N(4)                                                                                         | 174.5(3)  | N(8)-Ag(5)-O(20)    | 141.5(3)  |
| Symmetry transformations used to generate equivalent atoms for 2: #1 x-1,y-1,z+1.                       |           |                     |           |

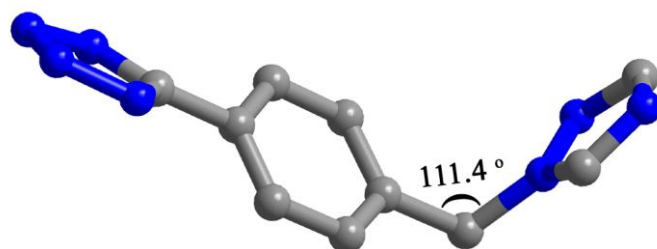

**Fig. S1** The coordination configuration of the L<sub>2</sub> ligand in compound 2.

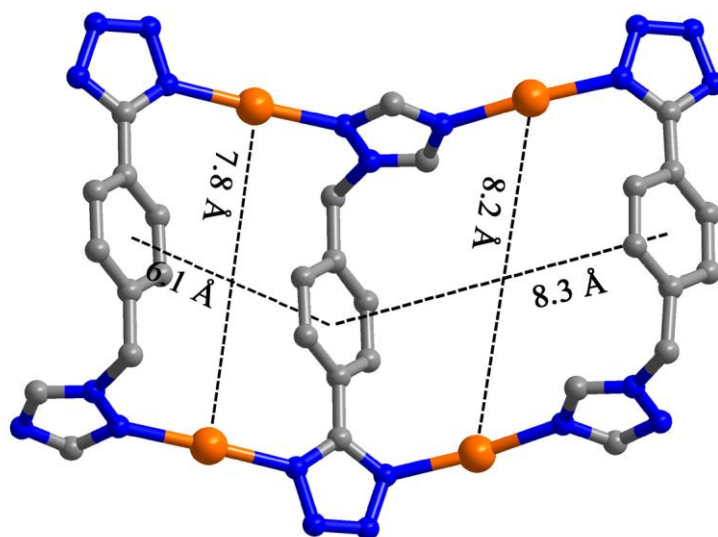

**Fig. S2** View of the circles in compound 2.

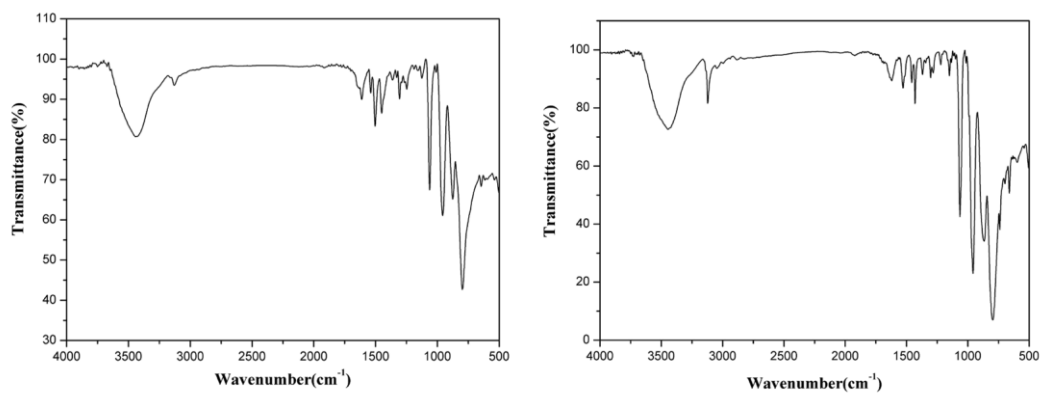

**Fig. S3** The IR spectrums of compounds 1(left) and 2(right).

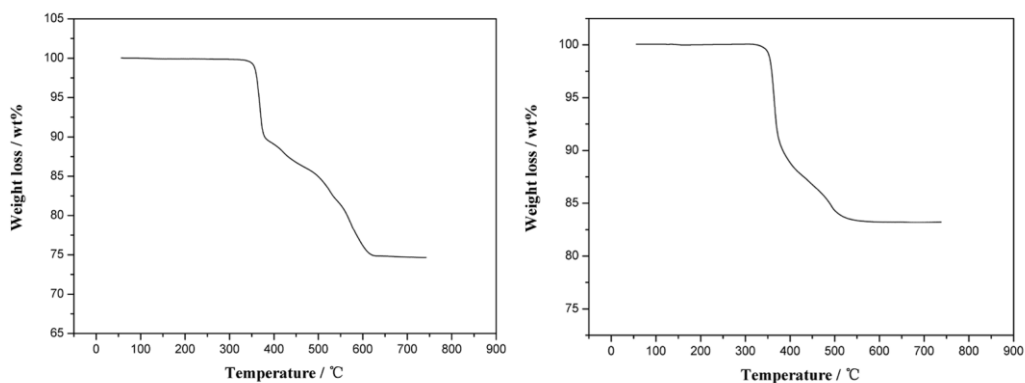

**Fig. S4** TG curves of compounds **1**(left) and **2**(right).

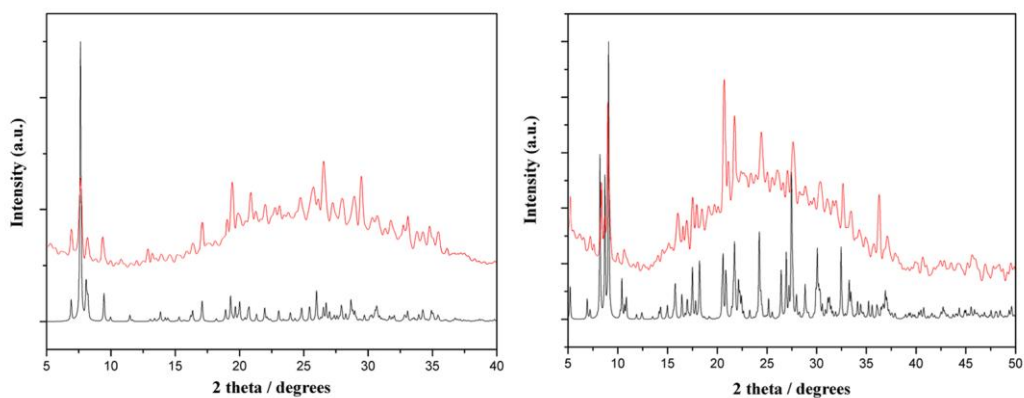

**Fig. S5** The PXRD patterns for compounds **1**(left) and **2**(right).
